# Supplementary material for: Molecular vibrational spectral simulation connects theoretical cluster structure identification and vibrational spectral evidence
Source: Royal Society of Chemistry journal article supplement (doi:10.1039/d2cp01651f), 2022-01-01
Supplement: d2cp01651f1.pdf [file d2cp01651f1.pdf]

## **Molecular Vibrational Spectral Simulation Connects Theoretical Cluster Structure Identification and Vibrational Spectral Evidence**

Ya-Juan Feng<sup>1\*</sup>, Chao Wang<sup>2\*</sup>

<sup>1</sup>School of Information Science and Technology, University of Science and  
Technology of China, Hefei, Anhui 230026, China

<sup>2</sup>National Synchrotron Radiation Laboratory, University of Science and Technology  
of China, Hefei, Anhui 230026, China

### **Corresponding Author**

\*E-mail: fengyj6@ustc.edu.cn; chaowng@ustc.edu.cn

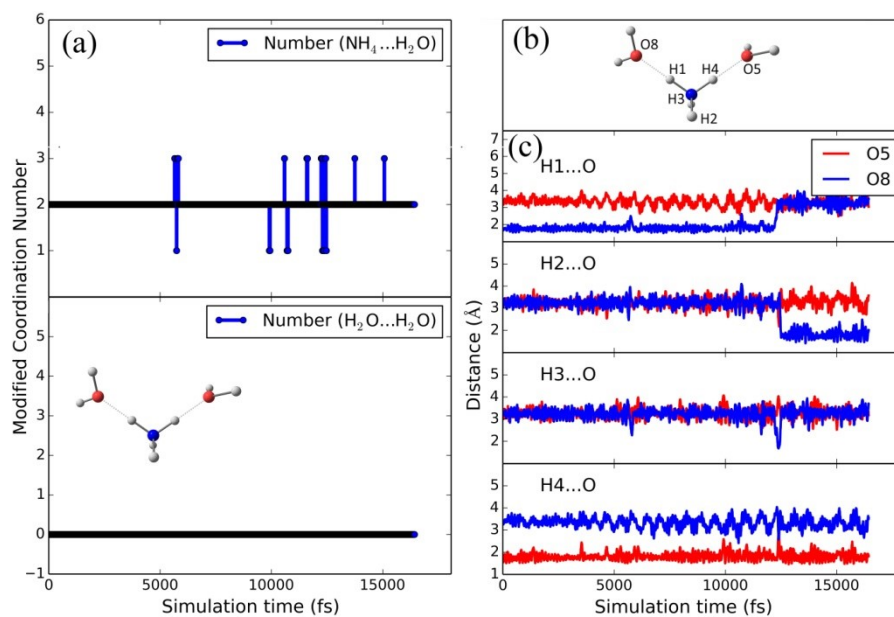

Figure S1. (a) The number of hydrogen bonding (NH...O and OH...OH) as a function of the simulation time in structural clustering for isomer 2a of  $\text{NH}_4^+(\text{H}_2\text{O})_2$ ; (b) the configuration of isomer 2a; and (c) the distance between atom H in  $\text{NH}_4^+$  and O in  $\text{H}_2\text{O}$  in as a function of the simulation time for isomer 2a.

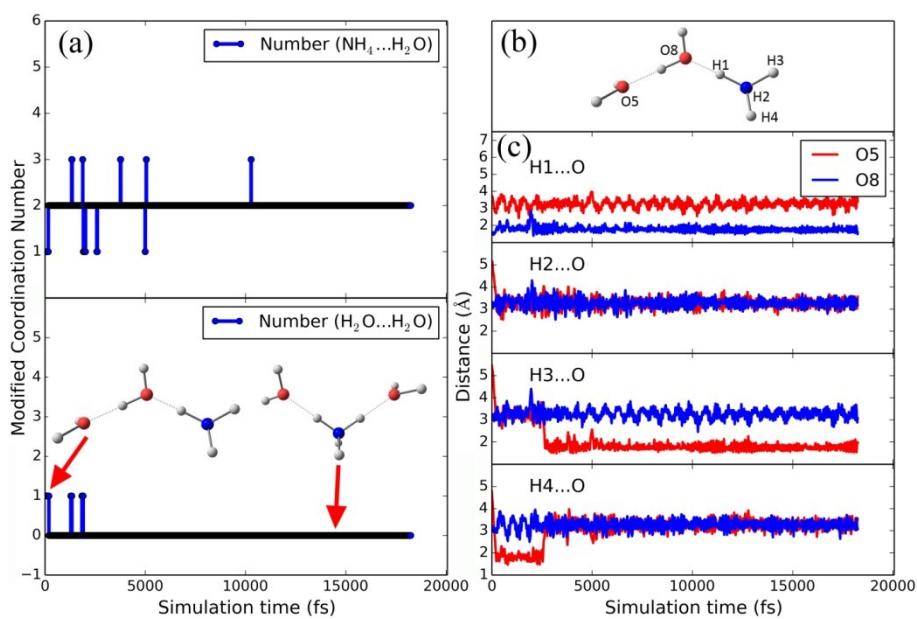

Figure S2. (a) The number of hydrogen bonding ( $\text{NH} \dots \text{O}$  and  $\text{OH} \dots \text{OH}$ ) as a function of the simulation time in structural clustering for isomer 2b of  $\text{NH}_4^+(\text{H}_2\text{O})_2$ ; (b) the configuration of isomer 2b; and (c) the distance between atom H in  $\text{NH}_4^+$  and O in  $\text{H}_2\text{O}$  in as a function of the simulation time for isomer 2b.

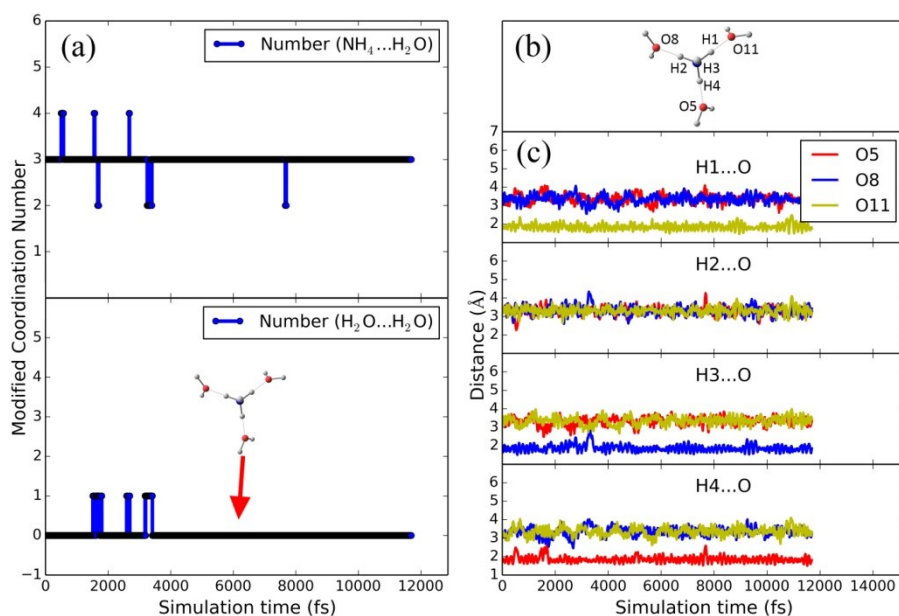

Figure S3. (a) The number of hydrogen bonding (NH...O and OH...OH) as a function of the simulation time in structural clustering for isomer 3a of  $\text{NH}_4^+(\text{H}_2\text{O})_3$ ; (b) the configuration of isomer 3a; and (c) the distance between atom H in  $\text{NH}_4^+$  and O in  $\text{H}_2\text{O}$  in as a function of the simulation time for isomer 3a.

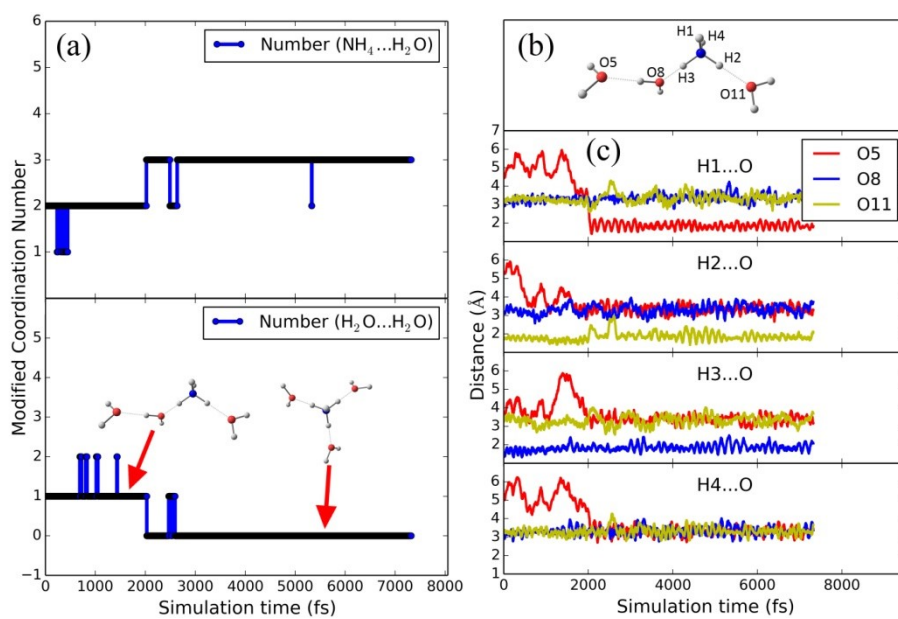

Figure S4. (a) The number of hydrogen bonding ( $\text{NH} \dots \text{O}$  and  $\text{OH} \dots \text{OH}$ ) as a function of the simulation time in structural clustering for isomer 3b of  $\text{NH}_4^+(\text{H}_2\text{O})_3$ ; (b) the configuration of isomer 3b; and (c) the distance between atom H in  $\text{NH}_4^+$  and O in  $\text{H}_2\text{O}$  in as a function of the simulation time for isomer 3b.

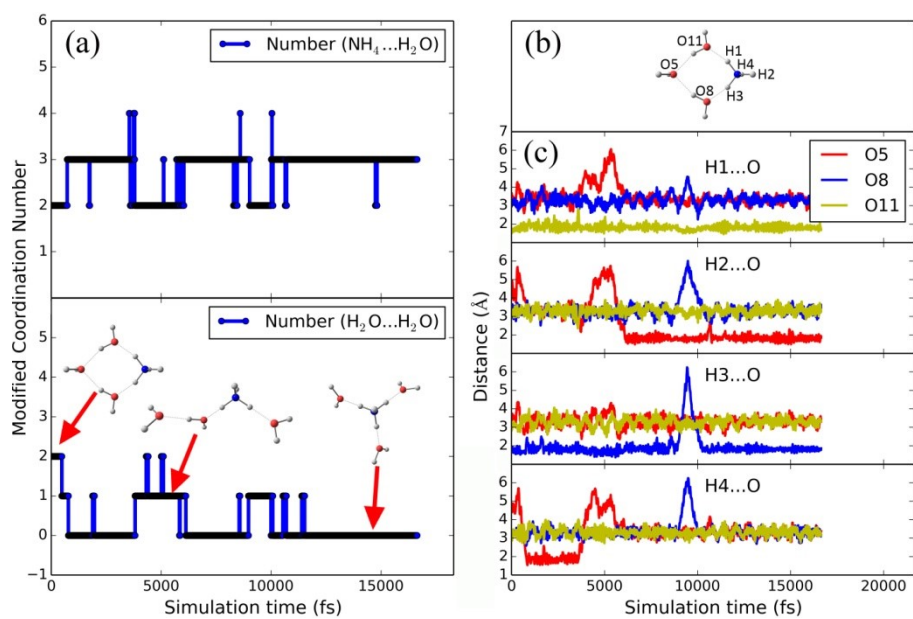

Figure S5. (a) The number of hydrogen bonding ( $\text{NH} \dots \text{O}$  and  $\text{OH} \dots \text{OH}$ ) as a function of the simulation time in structural clustering for isomer 3c of  $\text{NH}_4^+(\text{H}_2\text{O})_3$ ; (b) the configuration of isomer 3c; and (c) the distance between atom H in  $\text{NH}_4^+$  and O in  $\text{H}_2\text{O}$  in as a function of the simulation time for isomer 3c.

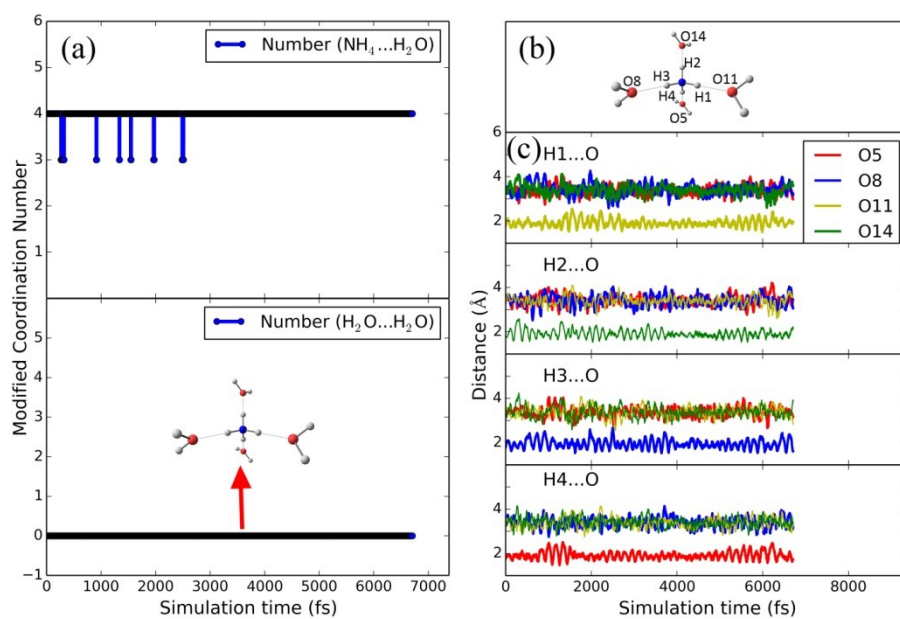

Figure S6. (a) The number of hydrogen bonding ( $\text{NH} \dots \text{O}$  and  $\text{OH} \dots \text{OH}$ ) as a function of the simulation time in structural clustering for isomer 4a of  $\text{NH}_4^+(\text{H}_2\text{O})_4$ ; (b) the configuration of isomer 4a; and (c) the distance between atom H in  $\text{NH}_4^+$  and O in  $\text{H}_2\text{O}$  in as a function of the simulation time for isomer 4a.

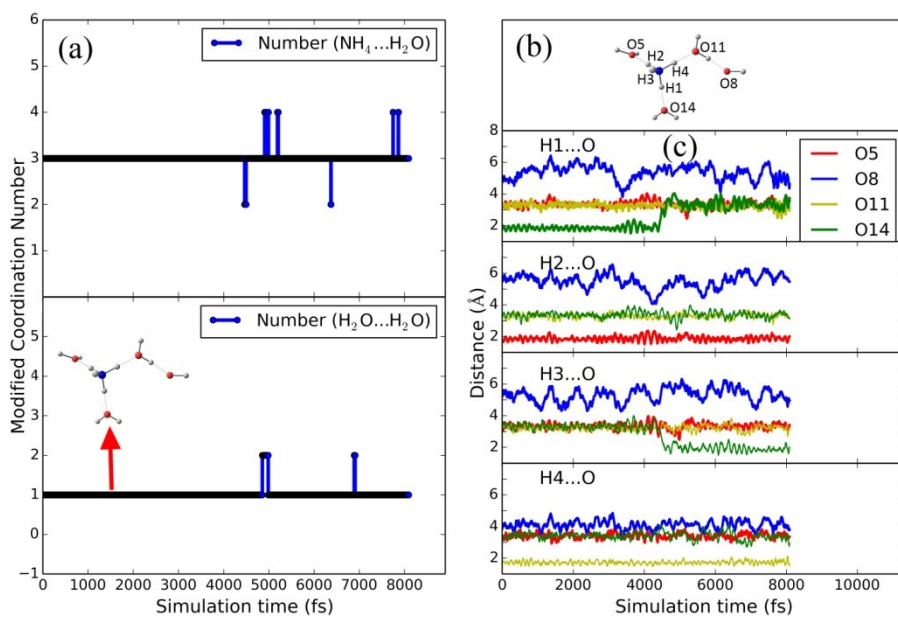

Figure S7. (a) The number of hydrogen bonding (NH...O and OH...OH) as a function of the simulation time in structural clustering for isomer 4b of  $\text{NH}_4^+(\text{H}_2\text{O})_4$ ; (b) the configuration of isomer 4b; and (c) the distance between atom H in  $\text{NH}_4^+$  and O in  $\text{H}_2\text{O}$  in as a function of the simulation time for isomer 4b.



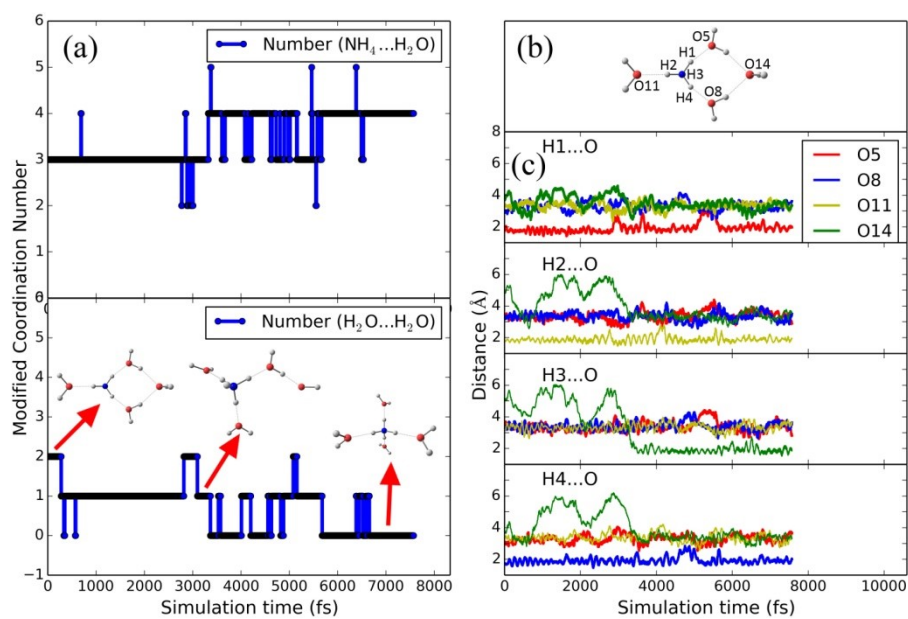

Figure S8. (a) The number of hydrogen bonding (NH...O and OH...OH) as a function of the simulation time in structural clustering for isomer 4c of  $\text{NH}_4^+(\text{H}_2\text{O})_4$ ; (b) the configuration of isomer 4c; and (c) the distance between atom H in  $\text{NH}_4^+$  and O in  $\text{H}_2\text{O}$  in as a function of the simulation time for isomer 4c.

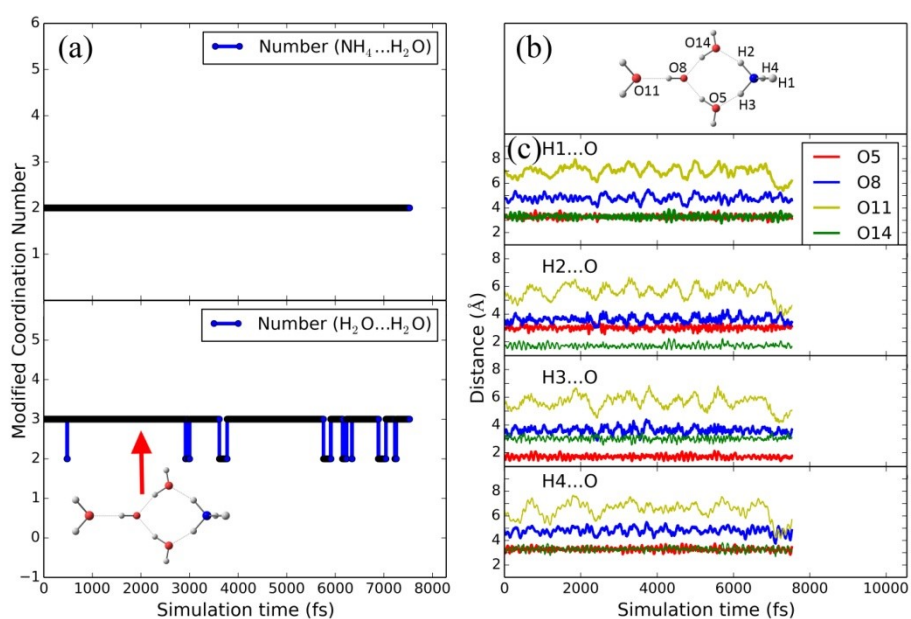

Figure S9. (a) The number of hydrogen bonding ( $\text{NH} \dots \text{O}$  and  $\text{OH} \dots \text{OH}$ ) as a function of the simulation time in structural clustering for isomer 4d of  $\text{NH}_4^+(\text{H}_2\text{O})_4$ ; (b) the configuration of isomer 4d; and (c) the distance between atom H in  $\text{NH}_4^+$  and O in  $\text{H}_2\text{O}$  in as a function of the simulation time for isomer 4d.
